# Supplementary figures and images for: Selectivity to approaching motion in retinal inputs to the dorsal visual pathway
Source: eLife journal article supplement (doi:10.7554/elife.51144), 2020-02-24

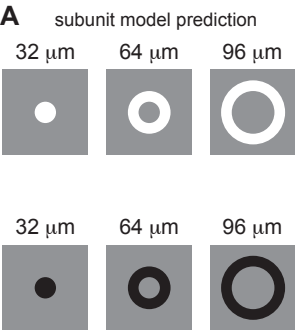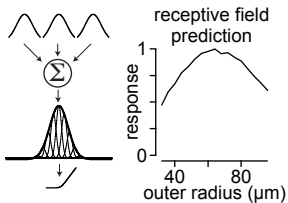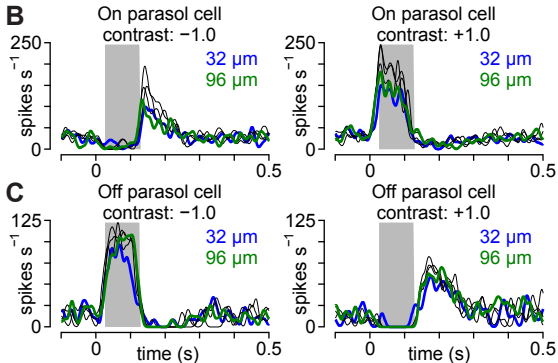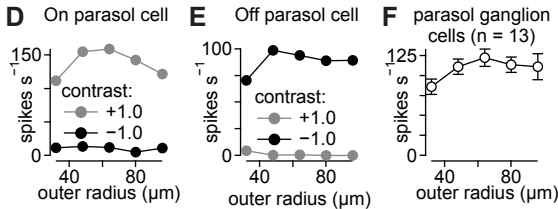

Supplement: supp [file elife_poa_e51144_Figure_5_figure_supplement_1.pdf › elife_poa_e51144_Figure_5_figure_supplement_1.pdf]

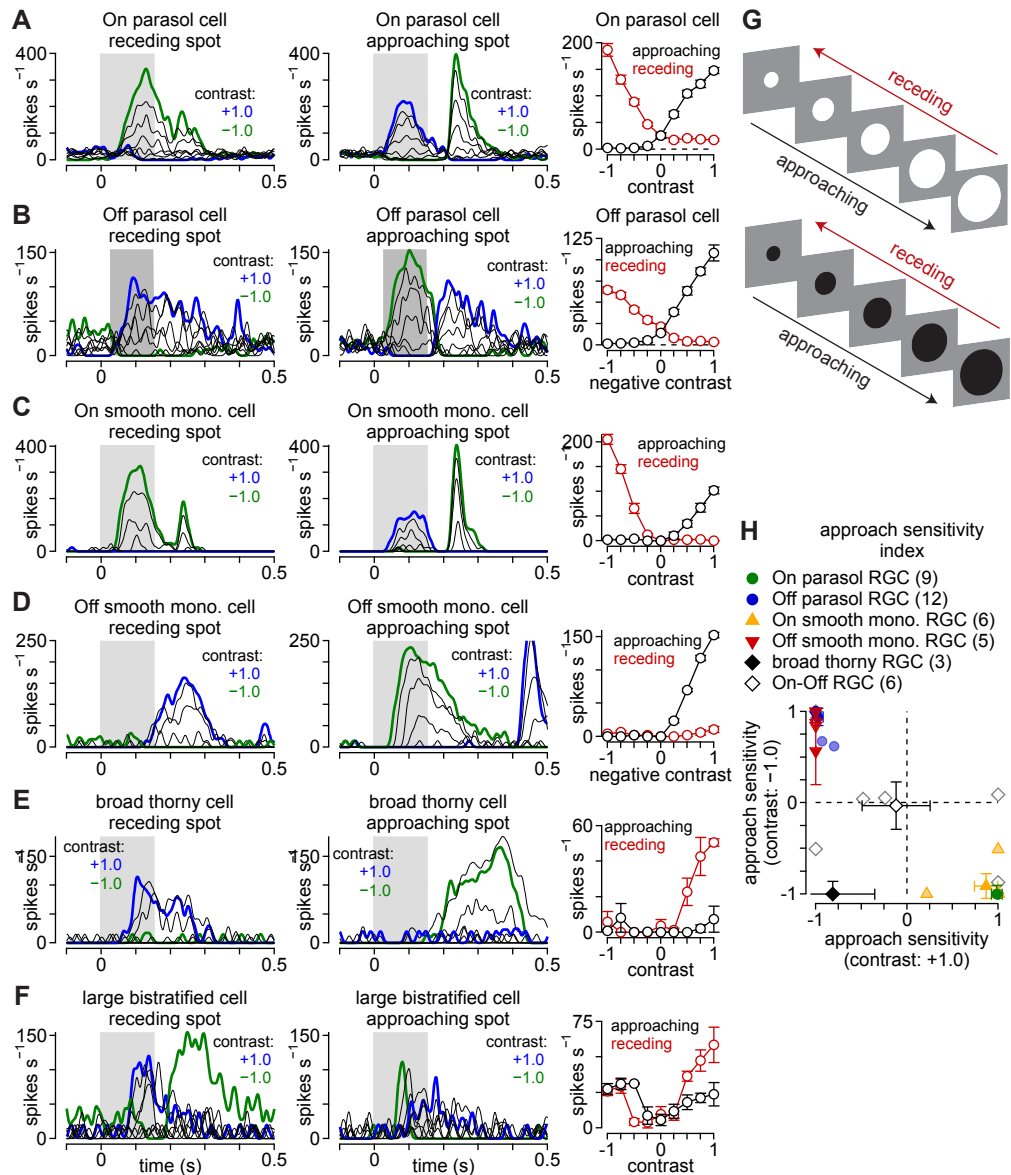

Supplement: supp [file elife_poa_e51144_Figure_6_figure_supplement_1.pdf › elife_poa_e51144_Figure_6_figure_supplement_1.pdf]

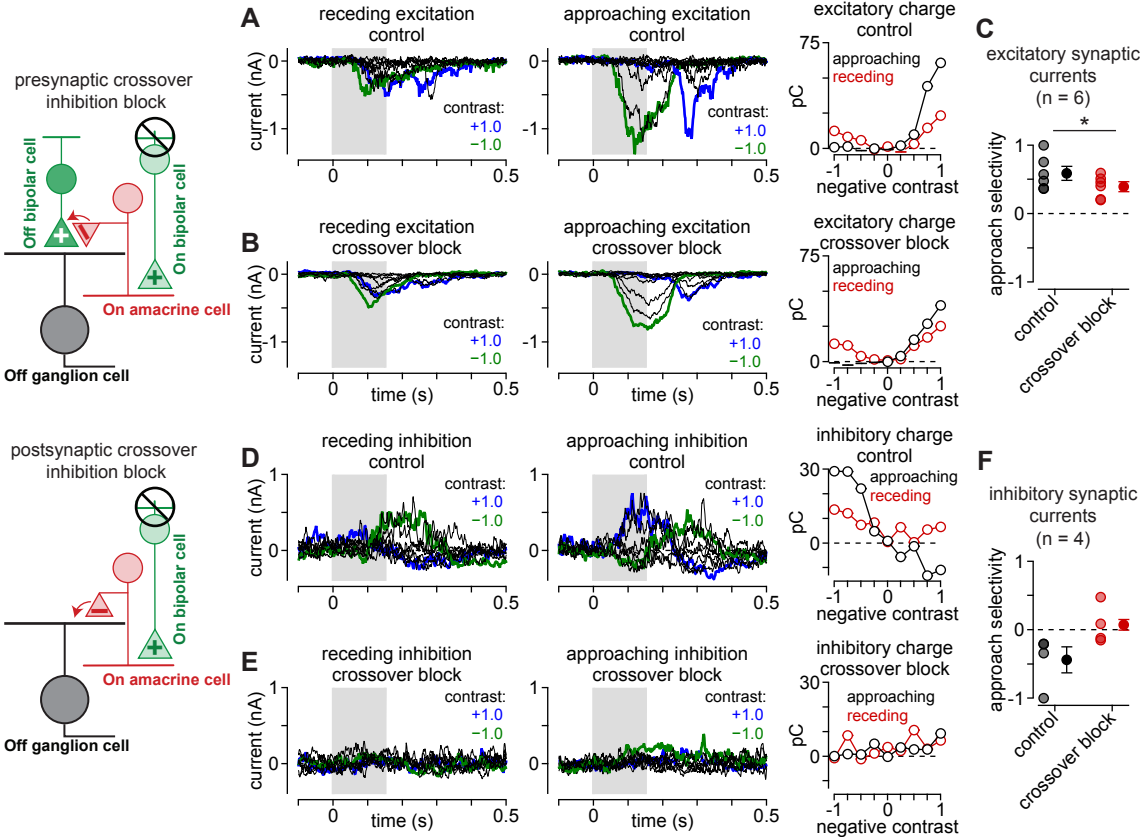

Supplement: supp [file elife_poa_e51144_Figure_7_figure_supplement_1.pdf › elife_poa_e51144_Figure_7_figure_supplement_1.pdf]
